# Supplementary material for: Impact of peripheral alkyl chain length on mesocrystal assemblies of G2 dendrons
Source: Royal Society of Chemistry journal article supplement (doi:10.1039/d3nr01243c), 2023-01-01
Supplement: d3nr01243c1.pdf [file d3nr01243c1.pdf]

## Supporting Information

### Impact of Peripheral Alkyl Chain Length on Mesocrystal Assemblies of G2 Dendrons

**Taesuk Jun,<sup>a</sup> Hyunjun Park,<sup>b</sup> Junsu Kim,<sup>a</sup> Wooseop Lee,<sup>c</sup> Hyungju Ahn,<sup>c</sup> Woo-Dong Jang,<sup>b,\*</sup> Byeongdu Lee,<sup>d,\*</sup> and Du Yeol Ryu<sup>a,\*</sup>**

<sup>a</sup>Department of Chemical and Biomolecular Engineering, Yonsei University, 50 Yonsei-ro, Seodaemun-gu, Seoul 03722, Korea.

<sup>b</sup>Department of Chemistry, Yonsei University, 50 Yonsei-ro, Seodaemun-gu, Seoul 03722, Korea.

<sup>c</sup>Industry Technology Convergence Center, Pohang Accelerator Laboratory, 80 Jigok-ro, Nam-gu, Pohang 37673, Korea.

<sup>d</sup>Advanced Photon Source, Argonne National Laboratory, Argonne, IL 60439, USA.

\*Correspondence to [wjjang@yonsei.ac.kr](mailto:wjjang@yonsei.ac.kr) (W. J.), [blee@anl.gov](mailto:blee@anl.gov) (B. L.), and [dyryu@yonsei.ac.kr](mailto:dyryu@yonsei.ac.kr) (D. Y. R.).

## Synthesis procedure

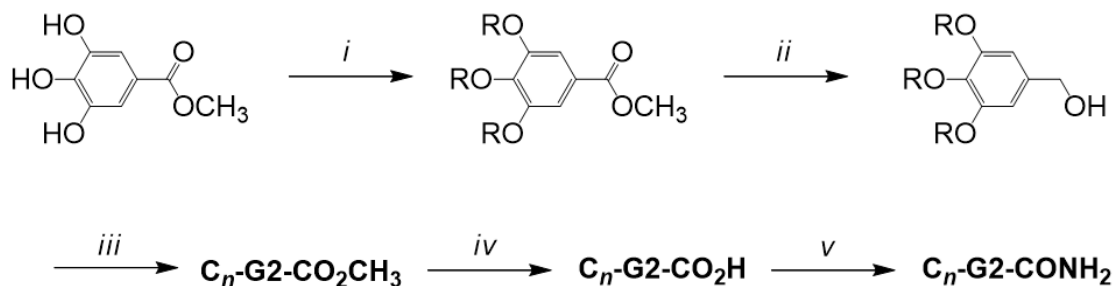

All reagents were purchased from Sigma-Aldrich, TCI, Alfa Aesar, Duksan, or Fluka. The commercial products of dichloromethane (CH<sub>2</sub>Cl<sub>2</sub>), n-hexane, tetrahydrofuran (THF), and methanol (CH<sub>3</sub>OH) were freshly distilled before each use, and all other chemicals were used as received without further purification. A series of C<sub>n</sub> dendrons were synthesized by a convergent method reported in a previous study using different 1-bromoalkanes with carbon numbers of  $n = 18, 14, 12, 10,$  and  $8$ .<sup>1</sup> Reagents and Conditions: (i) 1-bromododecane, K<sub>2</sub>CO<sub>3</sub>, 18-Crown-6, THF, reflux, 72 hr; (ii) LiAlH<sub>4</sub>, THF, 0 °C, 3 h; (iii) methyl 3,5-dihydroxybenzoate, PPh<sub>3</sub>, DIAD, THF, 0 °C, sonic 1 h; (iv) PPh<sub>3</sub>, phthalimide, DIAD, THF, 0 °C, sonic 1 h; then H<sub>2</sub>NNH<sub>2</sub>·H<sub>2</sub>O, THF/MeOH (5/1), reflux, 1 h. (v) 6 M NaOH, THF, reflux, 24 h.

## Reference

1. T. Jun, H. Park, S. Jeon, S. Jo, H. Ahn, W.-D. Jang, B. Lee and D. Y. Ryu, *Journal of the American Chemical Society*, 2021, **143**, 17548-17556.

## Supporting Figures

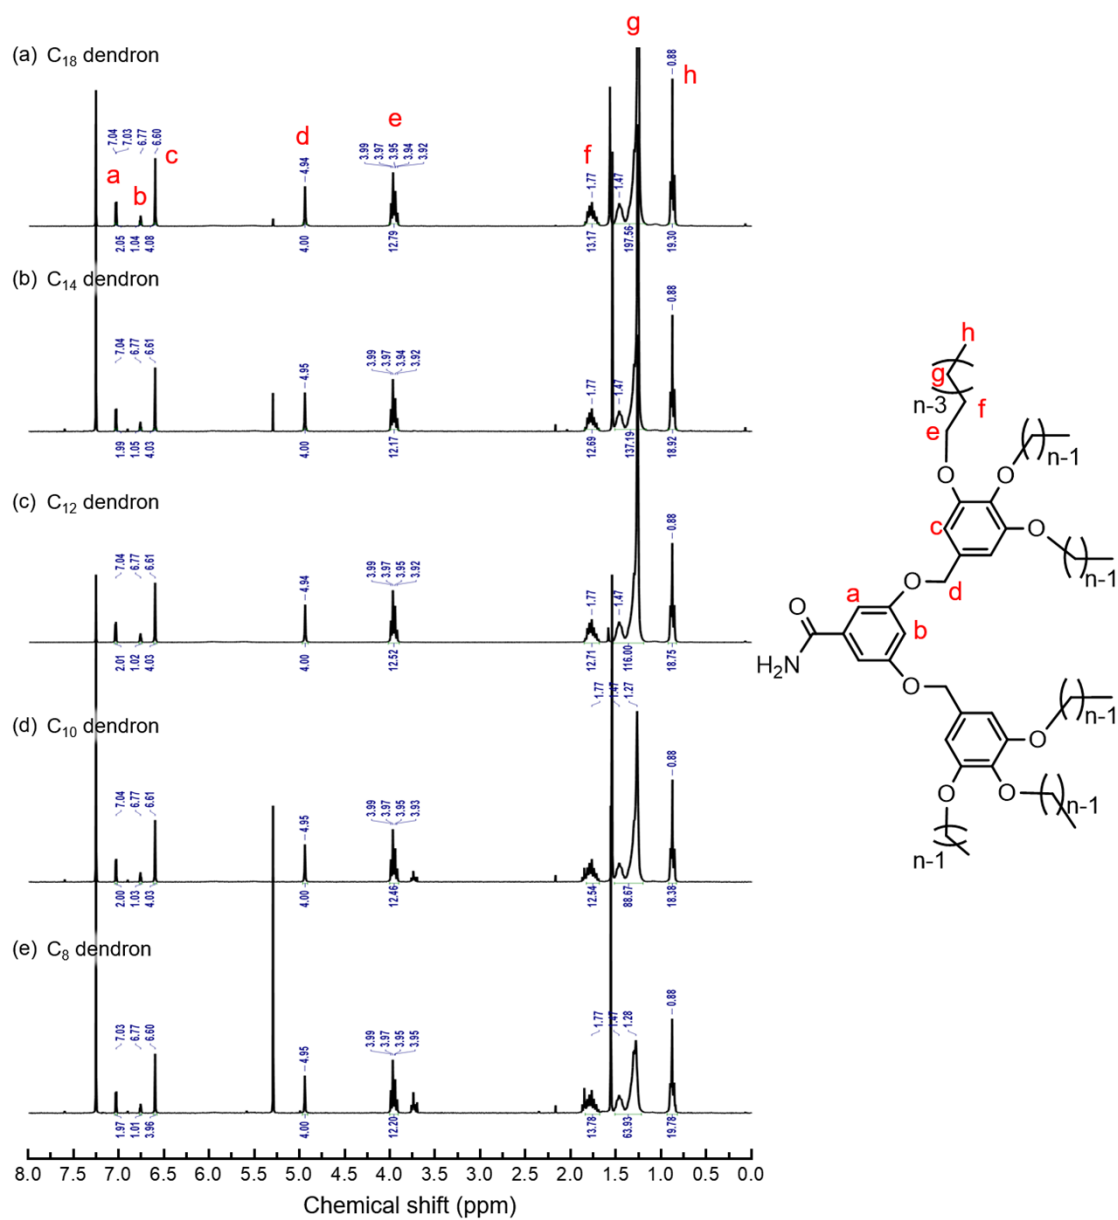

**Fig. S1**  $^1\text{H}$  NMR spectra of (a)  $\text{C}_{18}$ , (b)  $\text{C}_{14}$ , (c)  $\text{C}_{12}$ , (d)  $\text{C}_{10}$ , and (e)  $\text{C}_8$  dendrons in  $\text{CDCl}_3$  solvent.

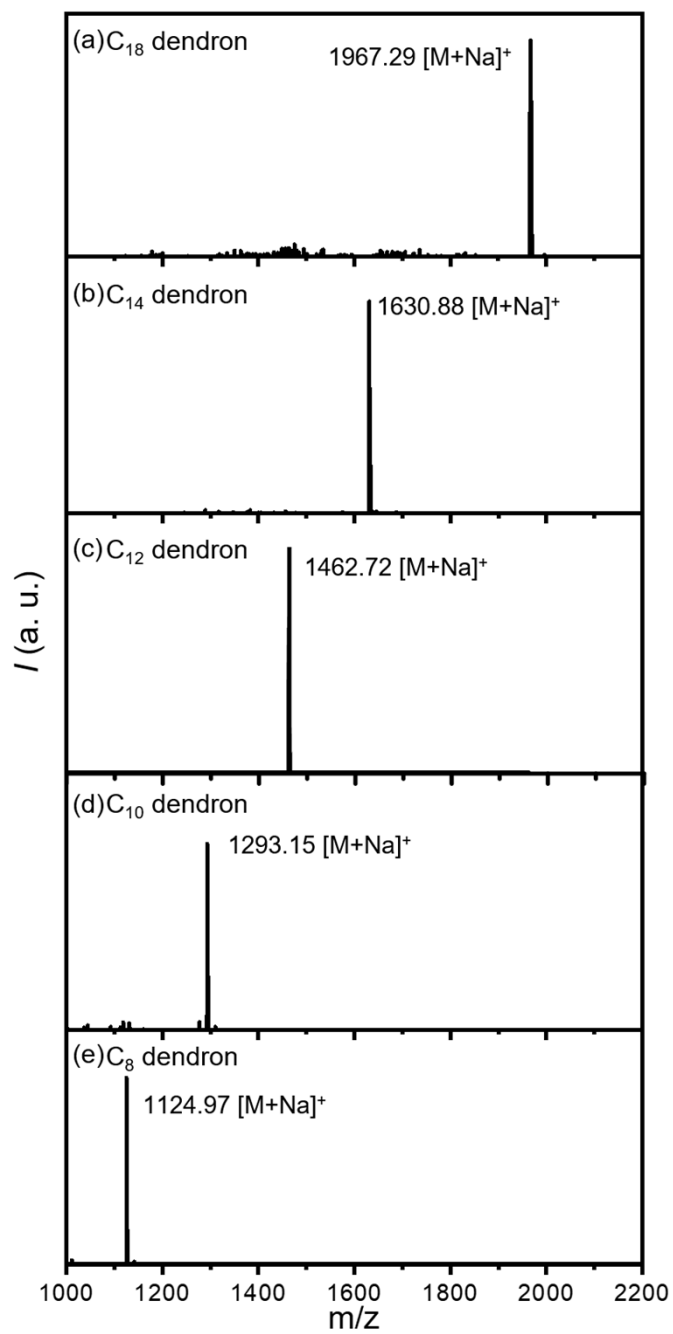

**Fig. S2** MALDI-TOF mass spectra of (a) C<sub>18</sub>, (b) C<sub>14</sub>, (c) C<sub>12</sub>, (d) C<sub>10</sub>, and (e) C<sub>8</sub> dendrons.

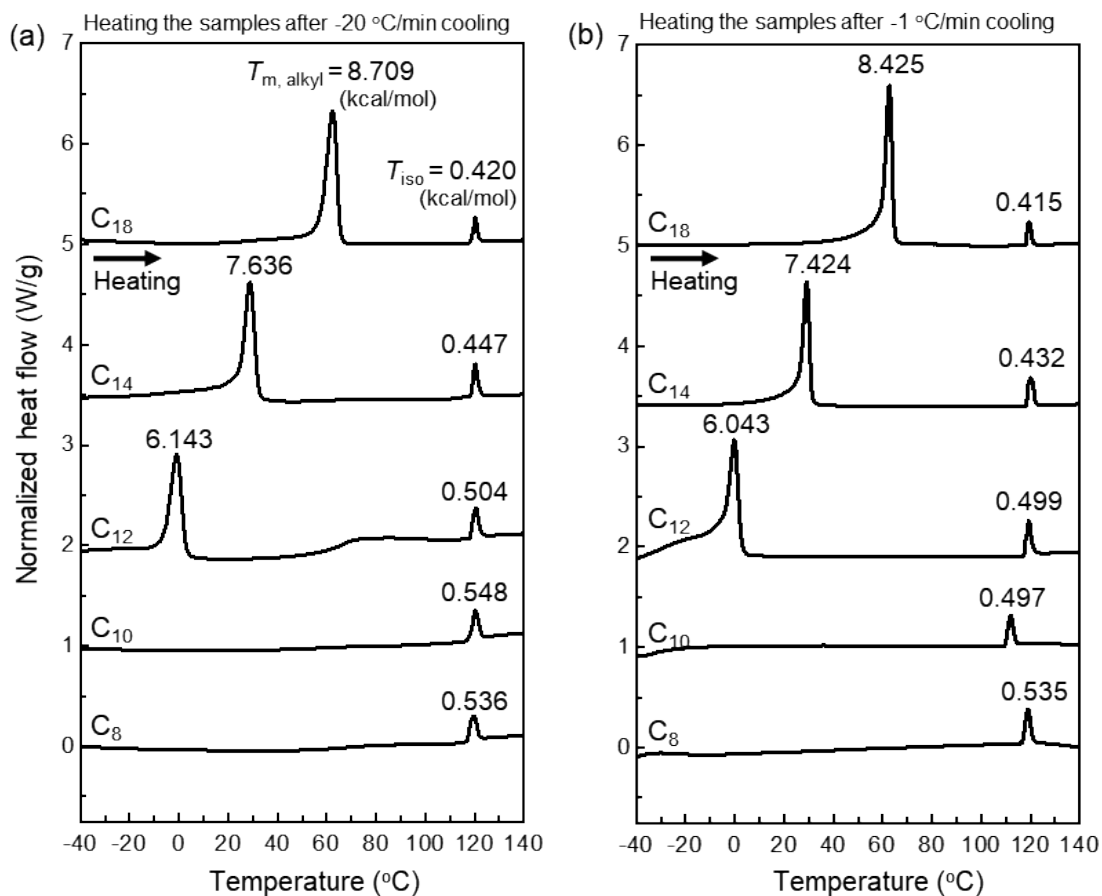

**Fig. S3** DSC thermograms of the  $C_n$  dendrons prepared by (a)  $-20$  and (b)  $-1\text{ }^\circ\text{C}/\text{min}$  cooling processes, measured at the heating rate of  $20\text{ }^\circ\text{C}/\text{min}$  from  $-40$  to  $140\text{ }^\circ\text{C}$ . The numbers on the peaks denote the magnitude of enthalpic change ( $|\Delta H|$ ) at transitions as a unit of kcal/mol.

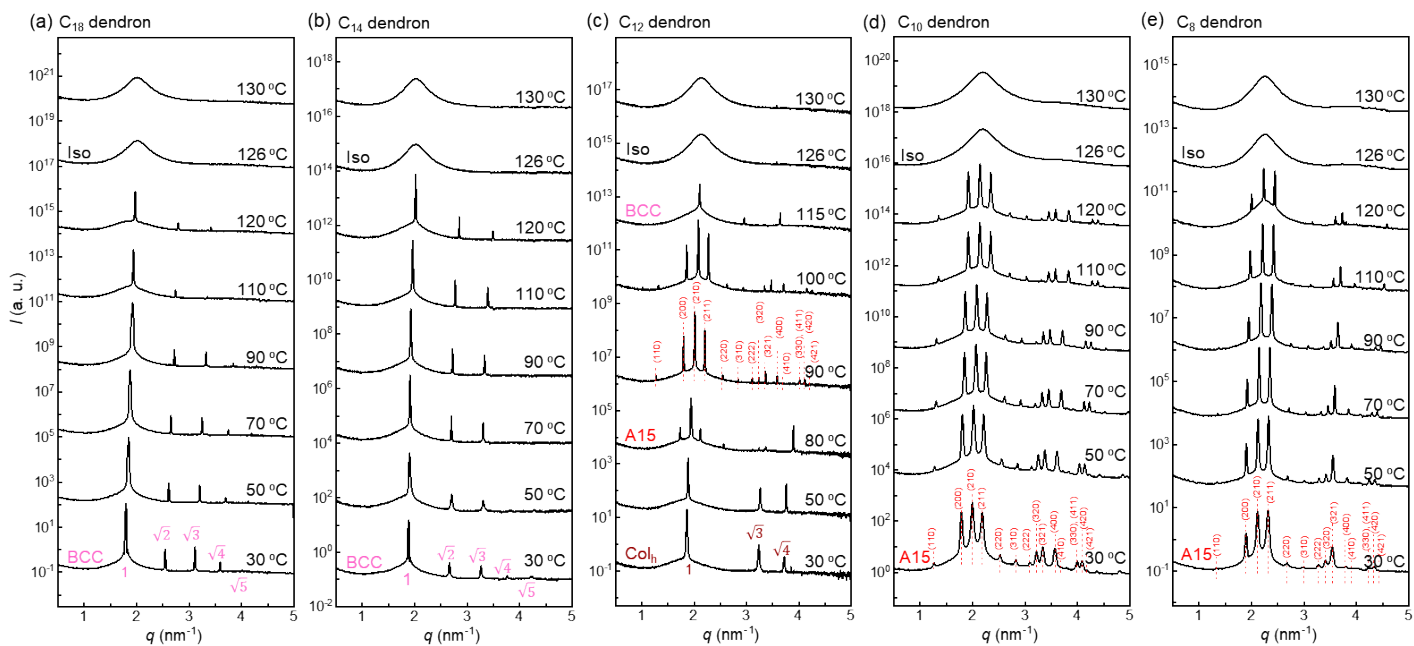

**Fig. S4** SAXS intensity profiles for as-cast (a)  $C_{18}$ , (b)  $C_{14}$ , (c)  $C_{12}$ , (d)  $C_{10}$ , and (e)  $C_8$  dendrons recorded at target temperatures during the stepwise heating process with a constant interval of 5 min considering the relatively rapid kinetics of dendrons in forming the mesocrystal structures.

Closed symbol (●):  $-20\text{ }^{\circ}\text{C}/\text{min}$   
Open symbol (○):  $-1\text{ }^{\circ}\text{C}/\text{min}$

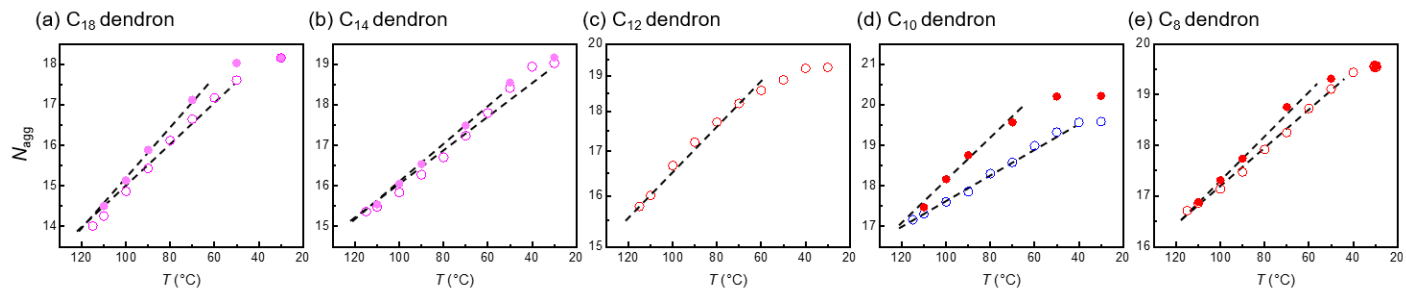

**Fig. S5**  $N_{\text{agg}}$ s of (a)  $C_{18}$ , (b)  $C_{14}$ , (c)  $C_{12}$ , (d)  $C_{10}$ , and (e)  $C_8$  dendrons during the fast- and slow-cooling processes. The closed and open symbols denote  $N_{\text{agg}}$ s from the fast- and slow-cooling processes, respectively, and the dotted lines guide initial rates of  $|dN_{\text{agg}}/dT|$  for the  $C_n$  dendrons.

## Supporting Table

**Table S1. Structural analysis of representative supramolecular dendron assemblies**

| Sample                                               | C <sub>18</sub> dendron     | C <sub>14</sub> dendron     | C <sub>12</sub> dendron       | C <sub>10</sub> dendron       | C <sub>8</sub> dendron      |
|------------------------------------------------------|-----------------------------|-----------------------------|-------------------------------|-------------------------------|-----------------------------|
| <i>M<sub>w</sub></i> (g/mol)                         | 1944                        | 1607                        | 1439                          | 1271                          | 1102                        |
| $\rho$ (g/cm <sup>3</sup> )                          | 0.970                       | 0.973                       | 0.975                         | 0.978                         | 0.981                       |
| <b>Phase at fast cooling</b>                         | BCC                         | BCC                         | Col <sub>h</sub> <sup>d</sup> | A15                           | A15                         |
| $\bar{R}$ (nm) at 110 & 30 °C <sup>a</sup>           | 2.273 / 2.440               | 2.172 / 2.325               | -                             | 2.074 / 2.184                 | 1.962 / 2.064               |
| $N_{\text{agg}}$ at 110 & 30 °C <sup>b</sup>         | 14.64 / 18.23               | 15.55 / 19.11               | -                             | 16.52 / 20.09                 | 16.86 / 19.67               |
| <i>a</i> (= <i>b</i> ), <i>c</i> (nm) at 110/30 °C   | 4.616, 4.616 / 4.956, 4.956 | 4.411, 4.411 / 4.722, 4.722 | -                             | 6.687, 6.687 / 7.041, 7.041   | 6.325, 6.325 / 6.654, 6.654 |
| $\Delta V/V$ <sup>c</sup>                            | 0                           | 0                           | -                             | 0.0119                        | 0.0119                      |
| <b>Phase at slow cooling</b>                         | BCC                         | BCC                         | BCC / A15                     | $\sigma$                      | A15                         |
| $R$ (nm) at 110 & 30 °C                              | 2.269 / 2.437               | 2.170 / 2.320               | 2.258 / 2.093                 | 2.071 / 2.151                 | 1.961 / 2.060               |
| $N_{\text{agg}}$ at 110 & 30 °C                      | 14.73 / 18.15               | 15.59 / 19.00               | 16.09 / 19.46                 | 16.47 / 19.50                 | 16.88 / 19.55               |
| <i>a</i> (= <i>b</i> ), <i>c</i> (nm) at 110 & 30 °C | 4.608, 4.608 / 4.950, 4.950 | 4.407, 4.407 / 4.712, 4.712 | 4.586, 4.586 / 6.748, 6.748   | 12.380, 7.283 / 12.859, 7.564 | 6.322, 6.322 / 6.641, 6.641 |
| $\Delta V/V$                                         | 0                           | 0                           | 0 / 0.0118                    | 0.0412                        | 0.0119                      |

$$V = 4\pi\bar{R}^3/3 = n^{-1} \sum_{i=1}^n V_i$$

<sup>a</sup>Mean particle radius ( $\bar{R}$ ) was calculated by

, where  $V_i$  is the  $i^{\text{th}}$  volume of  $n$  particles.

<sup>b</sup> $N_{\text{agg}} = \bar{R}^3 N_A \rho / (3M_w)$ , where  $N_A$ ,  $\rho$ , and  $M_w$  denote Avogadro's number ( $6.022 \times 10^{23}$ /mol), the density measured at 30 °C, and the molecular weight of each dendron, respectively.

$$\Delta V/V = n^{-1} \sum_{i=1}^n |V_i - V|/V.$$

<sup>c</sup>Particle size diversity

<sup>d</sup>Since the Col<sub>h</sub> structure is not a sphere-packing phase.
